# Supplementary material
Source: PubMed Central journal article supplement (PMC7721255)
Supplement: supp_8.4.E788_2020-0159-1-at.pdf [file supp_8.4.E788_2020-0159-1-at.pdf]

**Appendix 1 (as supplied by the authors):** Standardized form for data collection

| <b>Variable</b>                                                                                           | <b>Answer</b> | <b>Comments</b> |
|-----------------------------------------------------------------------------------------------------------|---------------|-----------------|
| Patient number                                                                                            |               |                 |
| Age                                                                                                       |               |                 |
| Sex – M/F                                                                                                 |               |                 |
| Height                                                                                                    |               |                 |
| Weight                                                                                                    |               |                 |
| Date of symptoms onset                                                                                    |               |                 |
| Date of admission                                                                                         |               |                 |
| Pregnant – Y/N                                                                                            |               |                 |
| Level of intervention                                                                                     |               |                 |
| Nursing home resident – Y/N                                                                               |               |                 |
| Charlson comorbidity index                                                                                |               |                 |
| SOFA score                                                                                                |               |                 |
| APACHE II score                                                                                           |               |                 |
| PaO <sub>2</sub> /FIO <sub>2</sub><br>*worst result 24 hours post intubation                              |               |                 |
| Hypertension – Y/N                                                                                        |               |                 |
| Diabetes Mellitus – Y/N                                                                                   |               |                 |
| Coronary artery disease – Y/N                                                                             |               |                 |
| Obesity – Y/N<br>*BMI > 30                                                                                |               |                 |
| Chronic kidney disease – Y/N                                                                              |               |                 |
| Chronic obstructive lung disease – Y/N                                                                    |               |                 |
| Asthma – Y/N                                                                                              |               |                 |
| Malignancy – Y/N                                                                                          |               |                 |
| Immunocompromised – Y/N<br>*HIV, patient chronically on steroids, chemotherapy,<br>or biologic medication |               |                 |
| Intubation – Y/N                                                                                          |               |                 |
| Date of intubation                                                                                        |               |                 |
| Date of extubation                                                                                        |               |                 |
| PEEP at 24 hours                                                                                          |               |                 |
| Prone positioning – Y/N                                                                                   |               |                 |
| High-flow nasal cannula – Y/N<br>- Reason for HFNC                                                        |               |                 |
| Neuromuscular blockade – Y/N                                                                              |               |                 |
| Corticosteroid – Y/N<br>- Date of steroid administration                                                  |               |                 |
| Azithromycin – Y/N                                                                                        |               |                 |
| Hydroxychloroquine – Y/N                                                                                  |               |                 |
| Tocilizumab – Y/N                                                                                         |               |                 |
| Oseltamivir – Y/N                                                                                         |               |                 |

|                                                                                    |  |  |
|------------------------------------------------------------------------------------|--|--|
| Lopinavir/Ritonavir – Y/N                                                          |  |  |
| Death in ICU – Y/N                                                                 |  |  |
| Death in hospital – Y/N                                                            |  |  |
| Discharged home – Y/N<br>- Date                                                    |  |  |
| Transferred to ward – Y/N<br>- Date                                                |  |  |
| Tracheostomy – Y/N                                                                 |  |  |
| ICU acquired infection – Y/N<br>*Positive culture result with pathogenic organisms |  |  |
| Atrial fibrillation – Y/N                                                          |  |  |
| Acute kidney injury – Y/N<br>*2x baseline creatinine                               |  |  |
| Renal replacement therapy – Y/N                                                    |  |  |
| Thromboembolic events – Y/N                                                        |  |  |
| Pulmonary embolism/DVT – Y/N                                                       |  |  |
| Ischemic stroke – Y/N                                                              |  |  |
| Peripheral arterial thrombosis – Y/N                                               |  |  |
